# Supplementary material
Source: publisher site journal article supplement (https://www.dovepress.com/article/97664)
Supplement: Supplementary file [file get_supplementary_file.php]

**Table S1 Detailed information of sequenced patients**

| ID | Sex    | Age | Time of operation | Tumor size (cm) | Pathology subtypes        | Grade | ER by IHC |
|----|--------|-----|-------------------|-----------------|---------------------------|-------|-----------|
| 1  | female | 54  | 2014/2/25         | 3.1*1.2*1.7     | invasive ductal carcinoma | II    | Negative  |
| 2  | female | 43  | 2013/11/7         | 3.0*3.5*2.1     | invasive ductal carcinoma | II    | Negative  |
| 3  | female | 59  | 2014/12/25        | 2.9*2.4*1.1     | invasive ductal carcinoma | II    | Negative  |
| 4  | female | 67  | 2013/11/21        | 1.8*1.5*1.0     | invasive ductal carcinoma | II    | Negative  |
| 5  | female | 48  | 2014/10/20        | 2.8*2.4*1.6     | invasive ductal carcinoma | III   | Negative  |
| 6  | female | 66  | 2014/7/1          | 5.6*4.0*4.2     | invasive ductal carcinoma | III   | Negative  |
| 7  | female | 52  | 2014/12/22        | 3.7*3.5*1.8     | invasive ductal carcinoma | III   | Negative  |

Abbreviations:ER, estrogen receptor;PR, progesterone receptor;HER-2, human epidermal receptor;IHC,histologically and immunohisto

| PR by IHC | HER2 status by IHC | FISH of HER2 | Stage |
|-----------|--------------------|--------------|-------|
| Negative  | ++                 | Positive     | II A  |
| Negative  | +++                | Positive     | II A  |
| Negative  | +++                | Positive     | II A  |
| Negative  | +++                | Positive     | IIIA  |
| Negative  | +++                | Positive     | IIIA  |
| Negative  | +++                | Positive     | IIIA  |
| Negative  | +++                | Positive     | IIIC  |

ochemistry;FISH, fluorescence in situ hybridization;
