# Supplementary material
Source: publisher site journal article supplement (https://www.dovepress.com/article/97664)
Supplement: Supplementary file [file get_supplementary_file.php]

**Table S2 Expression correlation between LncRNAs and HER2**

| Gene symbol    | type_of_gene   | correlation coefficient |
|----------------|----------------|-------------------------|
| ERBB2          | protein-coding | 1                       |
| LOC100288637   | pseudo         | 0.93272903              |
| MRPL3P1        | pseudo         | 0.916047625             |
| HNRNPLP1       | pseudo         | 0.915049028             |
| ARPC3P5        | pseudo         | 0.913140321             |
| LOC146253      | pseudo         | 0.910724767             |
| SNRPPF1        | pseudo         | 0.907538328             |
| LOC100131877   | pseudo         | 0.900606222             |
| LOC101928801   | ncRNA          | 0.895163224             |
| RPL23AP78      | pseudo         | 0.893629498             |
| XPOTP1         | pseudo         | 0.892062387             |
| ARPC3P3        | pseudo         | 0.890586469             |
| MAD2L1P1       | pseudo         | 0.889385259             |
| PFN1P1         | pseudo         | 0.888444269             |
| MEMO1P1        | pseudo         | 0.887621138             |
| LOC100505702   | ncRNA          | 0.885817111             |
| RPL39P20       | pseudo         | 0.882914171             |
| YWHAZP3        | pseudo         | 0.880705507             |
| COX5AP1        | pseudo         | 0.878567642             |
| LINC00152      | ncRNA          | 0.8772224               |
| LOC100289404   | pseudo         | 0.871259312             |
| RPL13P5        | pseudo         | -0.870310082            |
| LINC00337      | ncRNA          | 0.869829337             |
| LOC641367      | pseudo         | 0.868081725             |
| ARPC3P1        | pseudo         | 0.861840944             |
| MIAT           | ncRNA          | 0.861691682             |
| UBE2SP2        | pseudo         | 0.861050082             |
| CSTP2          | pseudo         | 0.861014091             |
| LINC00957      | ncRNA          | -0.860990317            |
| LOC100130417   | ncRNA          | 0.860624949             |
| CAPZA1P        | pseudo         | 0.85885313              |
| LOC101618237   | pseudo         | 0.856412914             |
| LOC643438      | pseudo         | 0.85318713              |
| KRT8P36        | pseudo         | 0.852653863             |
| SERF2-C150RF63 | ncRNA          | 0.851575966             |
| HNRNPABP1      | pseudo         | 0.849414515             |
| BMS1P3         | pseudo         | -0.84606008             |
| CFL1P4         | pseudo         | 0.845902648             |
| TPM3P4         | pseudo         | 0.840125767             |
| LOC101926949   | pseudo         | 0.839595509             |
| HNRNPA3P10     | pseudo         | 0.839496532             |
| DYNLL1P2       | pseudo         | 0.838478821             |
| RPL32P2        | pseudo         | 0.836492358             |
| LEF1-AS1       | ncRNA          | 0.836217763             |
| HSPA8P7        | pseudo         | 0.836174726             |
| LOC101928173   | ncRNA          | 0.836035074             |
| YBX3P1         | pseudo         | -0.834910432            |
| LOC100310848   | pseudo         | 0.834392251             |
| MIR497HG       | ncRNA          | -0.834070305            |
| HSPA9P1        | pseudo         | 0.833908469             |
| LOC101929122   | ncRNA          | 0.833030594             |

|              |        |              |
|--------------|--------|--------------|
| LOC343165    | pseudo | 0.829867212  |
| LOC646801    | pseudo | 0.828261909  |
| PGAM1P7      | pseudo | 0.827300254  |
| LINC00478    | ncRNA  | -0.826505714 |
| UBBP2        | pseudo | 0.825922027  |
| LOC101928492 | ncRNA  | -0.824956914 |
| LOC100288712 | pseudo | 0.823209955  |
| LOC100507002 | ncRNA  | -0.82107204  |
| S100A11P1    | pseudo | 0.818857869  |
| MT1L         | pseudo | -0.818730099 |
| TIMM8BP2     | pseudo | 0.818066345  |
| MIR155HG     | ncRNA  | 0.816104801  |
| GAPDHP51     | pseudo | 0.813801737  |
| PP14571      | ncRNA  | 0.812561327  |
| PPIAP2       | pseudo | 0.812385854  |
| RPL26P30     | pseudo | 0.811875599  |
| LOC100528061 | pseudo | 0.81149439   |
| LOC401286    | ncRNA  | -0.811303468 |
| LOC100422287 | pseudo | 0.810245243  |
| LOC100418997 | pseudo | -0.810167439 |
| CFL1P2       | pseudo | 0.810161032  |
| LOC100506811 | pseudo | 0.810082911  |
| RPLPOP2      | pseudo | 0.809588112  |
| KRT8P1       | pseudo | 0.809453316  |
| LOC100310852 | pseudo | 0.809007476  |
| HSPA8P1      | pseudo | 0.808895289  |
| LOC100507422 | pseudo | 0.807959414  |
| HINT1P1      | pseudo | 0.80789427   |
| MIR4435-1HG  | ncRNA  | 0.806772556  |
| RANP6        | pseudo | 0.805148925  |
| LOC100134259 | ncRNA  | -0.805059929 |
| PIR-FIGF     | ncRNA  | -0.804353908 |
| HLA-F-AS1    | ncRNA  | -0.803499513 |
| LOC100129566 | pseudo | 0.803485624  |
| LOC728417    | pseudo | 0.803216565  |
| TDPX2        | pseudo | 0.802498061  |
| MAGI2-AS3    | ncRNA  | -0.802441108 |
| LOC101927863 | ncRNA  | 0.802241848  |
| LOC344967    | pseudo | 0.801535185  |
| GAPDHP21     | pseudo | 0.800592502  |
| LOC100049716 | ncRNA  | -0.799965824 |
| LOC254128    | ncRNA  | -0.799497456 |
| LOC400940    | ncRNA  | 0.799110598  |
| KRT18P24     | pseudo | 0.798270313  |
| LOC643997    | pseudo | 0.798012413  |
| LOC101927943 | ncRNA  | -0.797859094 |
| COPS5P1      | pseudo | 0.797334303  |
| LOC150622    | ncRNA  | 0.797161129  |
| LOC101929596 | ncRNA  | -0.797116433 |
| WDFY3-AS2    | ncRNA  | -0.796924548 |
| TUBB3P1      | pseudo | 0.796301565  |
| LINC00933    | ncRNA  | -0.795718595 |
| LOC101928512 | ncRNA  | -0.795610594 |
| LOC730222    | pseudo | 0.794931078  |

|                |        |              |
|----------------|--------|--------------|
| LOC402175      | pseudo | 0.794589719  |
| SNRPGP9        | pseudo | 0.794173166  |
| SDHCP4         | pseudo | 0.793791225  |
| TRIM52-AS1     | ncRNA  | -0.793499114 |
| YWHAZP2        | pseudo | 0.793127285  |
| TMSB10P1       | pseudo | 0.791580206  |
| LOC441204      | ncRNA  | -0.791522964 |
| BOLA3-AS1      | ncRNA  | -0.790783369 |
| GNG12-AS1      | ncRNA  | -0.790718134 |
| NDUFB11P1      | pseudo | 0.790449431  |
| LOC100130171   | pseudo | 0.790129407  |
| LOC390298      | pseudo | 0.787658898  |
| H2AFZP3        | pseudo | 0.787289139  |
| NAPA-AS1       | ncRNA  | -0.787239304 |
| CCT5P1         | pseudo | 0.787184016  |
| PARP1P2        | pseudo | 0.787157295  |
| LIPE-AS1       | ncRNA  | -0.787088425 |
| FHP1           | pseudo | 0.786894568  |
| MKLN1-AS2      | ncRNA  | -0.78662243  |
| FGF14-AS2      | ncRNA  | -0.786618    |
| SNRPGP4        | pseudo | 0.786280846  |
| LOC286367      | ncRNA  | -0.785055832 |
| LOC101929504   | ncRNA  | 0.784936495  |
| HMGB1P20       | pseudo | 0.784410367  |
| CBX3P9         | pseudo | 0.784061033  |
| ERHP1          | pseudo | 0.783745584  |
| MTHFD2P7       | pseudo | 0.78350239   |
| LOC284825      | ncRNA  | -0.78330977  |
| LOC100420831   | pseudo | 0.782291514  |
| TPTE2P1        | pseudo | -0.782261406 |
| LOC100506834   | ncRNA  | -0.782085747 |
| FAM83H-AS1     | ncRNA  | 0.780745999  |
| RPS2P26        | pseudo | 0.780481684  |
| ACTR3P2        | pseudo | 0.780217337  |
| LOC148709      | pseudo | 0.7801572    |
| TRAF3IP2-AS1   | ncRNA  | -0.779957426 |
| LOC646616      | pseudo | 0.77940995   |
| HSPA8P8        | pseudo | 0.779062343  |
| C10orf32-AS3MT | ncRNA  | -0.778950176 |
| LOC100506178   | ncRNA  | -0.778947354 |
| LOC101927559   | ncRNA  | -0.778585798 |
| LOC643827      | pseudo | -0.778355298 |
| KRT18P65       | pseudo | 0.778249777  |
| MIR503HG       | ncRNA  | 0.777525427  |
| PSIMCT-1       | pseudo | 0.776826516  |
| LOC101927249   | ncRNA  | -0.776725949 |
| PCAT6          | ncRNA  | 0.776514758  |
| SRP9P1         | pseudo | 0.776124504  |
| LOC442320      | pseudo | 0.776094209  |
| UBE2SP1        | pseudo | 0.775985012  |
| FTLP17         | pseudo | 0.7756693    |
| LOC101928415   | ncRNA  | -0.775640645 |
| SERPINH1P1     | pseudo | 0.774671445  |
| LOC101927841   | ncRNA  | -0.774516315 |

|              |        |              |
|--------------|--------|--------------|
| S100A1IP4    | pseudo | 0.774495636  |
| LOC150417    | pseudo | 0.773820615  |
| GSTO3P       | pseudo | 0.77149993   |
| OSER1-AS1    | ncRNA  | -0.771170317 |
| RAC1P5       | pseudo | 0.771078845  |
| LOC101928015 | ncRNA  | -0.76924825  |
| ACTBP7       | pseudo | 0.768478004  |
| MIR100HG     | ncRNA  | -0.767833721 |
| LOC101929434 | ncRNA  | -0.767225446 |
| LOC644584    | pseudo | 0.766515661  |
| H2AFZP1      | pseudo | 0.766343814  |
| RP9P         | pseudo | -0.764896326 |
| LINC00312    | ncRNA  | -0.764857499 |
| SEPT10P1     | pseudo | -0.764323104 |
| TCEB1P2      | pseudo | 0.764315793  |
| BPMS-AS1     | ncRNA  | -0.762485281 |
| HMGAI1P2     | pseudo | 0.761113647  |
| PGDP1        | pseudo | 0.760644776  |
| CCT6P2       | pseudo | 0.760575659  |
| MESTIT1      | ncRNA  | -0.760510757 |
| LOC392226    | pseudo | 0.760272796  |
| UBE2CP3      | pseudo | 0.760171466  |
| RPL30P14     | pseudo | 0.759238607  |
| FAM172BP     | pseudo | 0.759210652  |
| MRPS18CP3    | pseudo | -0.758011857 |
| KRT8P14      | pseudo | 0.757526797  |
| LOC101927229 | ncRNA  | 0.757460846  |
| TOP1P1       | pseudo | 0.757361217  |
| C15orf37     | ncRNA  | 0.756518149  |
| LOC388955    | pseudo | 0.756403313  |
| LOC642590    | pseudo | 0.756086441  |
| HMGAI1P3     | pseudo | 0.75561043   |
| FGF13-AS1    | ncRNA  | -0.754538748 |
| HSPA8P16     | pseudo | 0.754481857  |
| MRPS11P1     | pseudo | 0.754394899  |
| LOC126987    | pseudo | 0.752573055  |
| LOC139952    | pseudo | 0.751032674  |
| PPP1R14BP2   | pseudo | 0.750297062  |
| EXOSC3P1     | pseudo | 0.750032139  |
| ARL6IP1P3    | pseudo | 0.749919644  |
| LINC00526    | ncRNA  | -0.74954039  |
| FLI1-AS1     | ncRNA  | -0.749506078 |
| LINC00539    | ncRNA  | 0.74856683   |
| UNC93B2      | pseudo | 0.747954987  |
| ST7-AS1      | ncRNA  | -0.747655039 |
| LINC00883    | ncRNA  | -0.746470638 |
| IMMTP1       | pseudo | 0.746282461  |
| KRT18P23     | pseudo | 0.746197736  |
| LOC100506476 | ncRNA  | -0.745851103 |
| LOC101929506 | ncRNA  | 0.745805827  |
| FAM115B      | pseudo | -0.744824467 |
| LYPLA1P3     | pseudo | 0.744815869  |
| ATP5C1P1     | pseudo | 0.744266429  |
| TMPO-AS1     | ncRNA  | 0.743439294  |

|              |        |              |
|--------------|--------|--------------|
| DI030S       | ncRNA  | -0.74193757  |
| MRPS16P1     | pseudo | 0.741900084  |
| LOC100131482 | pseudo | 0.740595776  |
| YWHAZP5      | pseudo | 0.740164965  |
| NAPSB        | pseudo | 0.738966395  |
| SYS1-DBNDD2  | ncRNA  | -0.73844625  |
| LOC100506795 | ncRNA  | -0.738262629 |
| LOC642373    | pseudo | -0.737535528 |
| LOC100506411 | ncRNA  | 0.736885561  |
| TSEN15P1     | pseudo | 0.736871827  |
| LOC101928227 | ncRNA  | 0.736708328  |
| WHAMMP2      | pseudo | -0.736558114 |
| KRT8P34      | pseudo | 0.735596268  |
| SNRPGP2      | pseudo | 0.735490925  |
| LOC643513    | pseudo | 0.734345258  |
| LOC101927634 | ncRNA  | 0.733950944  |
| SLC25A5P7    | pseudo | 0.733909694  |
| LOC132386    | pseudo | 0.733703367  |
| LOC101928187 | ncRNA  | -0.733680869 |
| RPS26P19     | pseudo | 0.733522425  |
| LYPLA1P2     | pseudo | 0.733508415  |
| LOC286437    | ncRNA  | -0.732708053 |
| SRP14-AS1    | ncRNA  | -0.732452054 |
| KRT8P23      | pseudo | 0.731520658  |
| WHAMMP3      | pseudo | -0.730403034 |
| GDI2P1       | pseudo | 0.730278884  |
| RPS15P6      | pseudo | 0.73014834   |
| NR2F2-AS1    | ncRNA  | -0.729906131 |
| LOC441505    | pseudo | 0.729876524  |
| LOC101929072 | ncRNA  | -0.72979655  |
| LOC101928931 | ncRNA  | -0.728185773 |
| LOC101929613 | ncRNA  | 0.728177668  |
| TNRC6C-AS1   | ncRNA  | 0.727971508  |
| LOC100421474 | pseudo | 0.727681798  |
| MKLN1-AS1    | ncRNA  | -0.727665353 |
| OR7E28P      | pseudo | -0.727485731 |
| FDPSP5       | pseudo | 0.726588868  |
| MBNL1-AS1    | ncRNA  | -0.726489317 |
| LOC101928882 | ncRNA  | -0.726398554 |
| KRT18P2      | pseudo | 0.725913208  |
| UNC93B5      | pseudo | 0.725405631  |
| AURKAPS1     | pseudo | 0.724832229  |
| LOC283575    | ncRNA  | -0.724301932 |
| LOC101929423 | ncRNA  | -0.724034453 |
| KRT8P19      | pseudo | 0.72388779   |
| RAET1K       | pseudo | 0.723657117  |
| LOC100506990 | ncRNA  | -0.723456565 |
| LOC101927100 | ncRNA  | -0.723017626 |
| LOC100132973 | pseudo | 0.722804705  |
| PAXIP1-AS2   | ncRNA  | -0.722286879 |
| CSPG4P11     | pseudo | -0.722247953 |
| SRSF9P1      | pseudo | 0.722239344  |
| HSPA8P9      | pseudo | 0.722155428  |
| LOC442058    | pseudo | 0.722144798  |

|              |        |              |
|--------------|--------|--------------|
| LOC101929241 | ncRNA  | 0.722091765  |
| LOC100289092 | ncRNA  | 0.721909595  |
| GNG5P2       | pseudo | 0.721720866  |
| LOC100288748 | ncRNA  | 0.721698771  |
| LOC101928687 | ncRNA  | 0.721574057  |
| PPATP1       | pseudo | 0.720939796  |
| VDAC1P2      | pseudo | 0.720682738  |
| LINC00961    | ncRNA  | -0.720365632 |
| ZSCAN16-AS1  | ncRNA  | -0.720352375 |
| ATP6VOE2-AS1 | ncRNA  | -0.719145845 |
| LOC101929440 | ncRNA  | 0.718841305  |
| RAMP2-AS1    | ncRNA  | -0.718638756 |
| PKMP1        | pseudo | 0.718211287  |
| LOC101929500 | ncRNA  | -0.717975113 |
| LOC100131060 | ncRNA  | -0.717964308 |
| CCL15-CCL14  | ncRNA  | -0.717095592 |
| A2M-AS1      | ncRNA  | -0.716132396 |
| CBX3P1       | pseudo | 0.716064889  |
| LOC100131825 | ncRNA  | -0.715286272 |
| TMEM220-AS1  | ncRNA  | -0.715255548 |
| KRT8P40      | pseudo | 0.714997174  |
| HOXA-AS4     | ncRNA  | -0.714286671 |
| KRT18P29     | pseudo | 0.712893589  |
| FAM66C       | ncRNA  | -0.712800596 |
| RPL7AP64     | pseudo | 0.712646115  |
| TRBV21-1     | pseudo | 0.712615589  |
| LINC00087    | ncRNA  | -0.711939927 |
| ZNF667-AS1   | ncRNA  | -0.711883182 |
| LOC101928325 | ncRNA  | -0.71156655  |
| LOC729970    | ncRNA  | -0.71154782  |
| RPL26P37     | pseudo | -0.710086962 |
| CHCHD2P6     | pseudo | 0.710057971  |
| LPP-AS2      | ncRNA  | -0.709790628 |
| HCG11        | ncRNA  | -0.708956644 |
| RPL23AP1     | pseudo | -0.708425628 |
| CDK5PS       | pseudo | 0.708370904  |
| ANKRD20A14P  | pseudo | -0.708080832 |
| TIMM8AP1     | pseudo | 0.707771299  |
| LOC100506055 | pseudo | -0.707713226 |
| ERP29P1      | pseudo | 0.707435516  |
| LOC101927574 | ncRNA  | -0.707219488 |
| HSPD1P4      | pseudo | 0.707117336  |
| FAM85A       | ncRNA  | -0.706230577 |
| LOC441454    | pseudo | 0.705746803  |
| LOC100420464 | pseudo | -0.705323074 |
| LOC650368    | pseudo | -0.704774297 |
| LOC101929483 | pseudo | 0.704257875  |
| LOC101928479 | pseudo | 0.704007548  |
| LOC100996255 | ncRNA  | -0.703602312 |
| AK3P3        | pseudo | -0.703532812 |
| RPL39P17     | pseudo | 0.703330581  |
| H2AFZP2      | pseudo | 0.70329987   |
| LOC101928200 | ncRNA  | -0.702471328 |
| PRKG1-AS1    | ncRNA  | 0.701926683  |

|              |        |              |
|--------------|--------|--------------|
| AQP7P3       | pseudo | -0.701790713 |
| LOC389332    | ncRNA  | 0.701776592  |
| LOC101927117 | ncRNA  | -0.701430038 |
| KRT8P22      | pseudo | 0.701067045  |
| LOC101929335 | ncRNA  | -0.700955053 |
| CKS1BP6      | pseudo | 0.700890198  |
| LINC00997    | ncRNA  | -0.700868283 |
| PPIAP22      | pseudo | 0.69954314   |
| PKMP2        | pseudo | 0.699209624  |
| LOC101929724 | ncRNA  | -0.697757772 |
| LOC400043    | ncRNA  | -0.697477379 |
| LINC00861    | ncRNA  | 0.697251103  |
| LOC283731    | ncRNA  | -0.696899096 |
| HAND2-AS1    | ncRNA  | -0.69638832  |
| ESRRAP1      | pseudo | 0.695358751  |
| LOC642236    | pseudo | -0.695043455 |
| CCDC144B     | pseudo | -0.695026172 |
| LOC101928219 | ncRNA  | -0.694019061 |
| DNAJA1P3     | pseudo | 0.693939843  |
| LOC101928118 | ncRNA  | -0.693475938 |
| YWHAZP7      | pseudo | 0.693322752  |
| LOC101928123 | ncRNA  | -0.692406092 |
| LOC100506731 | ncRNA  | -0.692197851 |
| HOXD-AS2     | ncRNA  | -0.691930524 |
| OGFOD1P1     | pseudo | 0.69178002   |
| LOC100505938 | ncRNA  | 0.691720481  |
| LOC388734    | pseudo | 0.691686477  |
| LOC100422204 | pseudo | -0.691343557 |
| PTTG3P       | pseudo | 0.691143209  |
| LOC100129492 | pseudo | 0.691125937  |
| LOC101927192 | ncRNA  | -0.690333789 |
| TUBB2BP1     | pseudo | -0.690165944 |
| LOC100287846 | pseudo | -0.690148314 |
| PGM5P1       | pseudo | -0.689941998 |
| LOC101928692 | ncRNA  | -0.68969865  |
| LOC101927084 | ncRNA  | -0.689251004 |
| IL6STP1      | pseudo | -0.689094792 |
| LOC101927392 | ncRNA  | -0.689004911 |
| LOC101059954 | ncRNA  | 0.688992927  |
| LOC101928685 | pseudo | -0.688774209 |
| LOC101927075 | ncRNA  | -0.688667731 |
| LOC644656    | ncRNA  | 0.688293857  |
| LINC00922    | ncRNA  | 0.688001071  |
| LOC100131369 | pseudo | -0.6878889   |
| GAS6-AS2     | ncRNA  | -0.68746448  |
| LETM1P2      | pseudo | 0.686884407  |
| CDC14C       | pseudo | -0.686823353 |
| CCT8P1       | pseudo | 0.686678608  |
| GAPDHP70     | pseudo | 0.686035124  |
| LOC100131785 | pseudo | 0.685881358  |
| RPLP1P12     | pseudo | 0.684578644  |
| MRPL36P1     | pseudo | 0.684485756  |
| HOTAIR       | ncRNA  | 0.684005307  |
| CETN4P       | pseudo | -0.683929652 |

|              |        |              |
|--------------|--------|--------------|
| RPS24P7      | pseudo | 0.683584219  |
| GGTA1P       | pseudo | -0.6831133   |
| LOC441402    | pseudo | -0.682861066 |
| LOC101926960 | ncRNA  | -0.682712677 |
| PRH1-PRR4    | ncRNA  | -0.682127206 |
| LOC100507351 | ncRNA  | -0.68181     |
| LOC283856    | ncRNA  | -0.680862285 |
| HDGFP1       | pseudo | 0.680403869  |
| YAP1P1       | pseudo | -0.679747168 |
| LOC100421166 | pseudo | -0.679626556 |
| CEBPA-AS1    | ncRNA  | -0.679496411 |
| OR7E91P      | pseudo | 0.678733835  |
| LOC131054    | pseudo | -0.678414215 |
| LOC138864    | pseudo | 0.678267254  |
| VDAC1P1      | pseudo | 0.67782756   |
| PPIAP6       | pseudo | 0.677684444  |
| PKMP5        | pseudo | 0.677342817  |
| KRT18P17     | pseudo | 0.676833293  |
| LOC101928796 | ncRNA  | -0.675581348 |
| LOC643733    | pseudo | -0.675430863 |
| TCEB1P22     | pseudo | 0.674522722  |
| LOC101929555 | ncRNA  | -0.674209905 |
| TUBAP2       | pseudo | 0.674012233  |
| LOC100422562 | pseudo | 0.673865372  |
| LOC100126784 | ncRNA  | -0.673708513 |
| OSTCP5       | pseudo | 0.673700748  |
| MEIS3P1      | pseudo | -0.673660471 |
| SBF1P1       | pseudo | 0.673596296  |
| CD24P4       | pseudo | 0.673310439  |
| SNX18P16     | pseudo | -0.672357489 |
| PROX1-AS1    | ncRNA  | -0.672181439 |
| PRELID1P1    | pseudo | 0.671903497  |
| LINC00886    | ncRNA  | -0.670943595 |
| LOC284600    | ncRNA  | 0.670282256  |
| CFL1P3       | pseudo | 0.670270052  |
| PSME2P1      | pseudo | 0.670205236  |
| LOC100507600 | ncRNA  | 0.670154572  |
| LOC101927771 | ncRNA  | -0.670143215 |
| LOC284930    | ncRNA  | 0.670116648  |
| FOXO3B       | pseudo | -0.669530424 |
| LOC101926896 | ncRNA  | -0.66943843  |
| LOC653160    | ncRNA  | -0.669175591 |
| LOC101927289 | ncRNA  | 0.668897367  |
| RPLP2P3      | pseudo | -0.668841513 |
| LOC441228    | pseudo | 0.668834078  |
| SDHCP3       | pseudo | 0.668747166  |
| RPS3AP47     | pseudo | -0.668503309 |
| LOC100287369 | pseudo | 0.668244533  |
| LIFR-AS1     | ncRNA  | -0.668107251 |
| RPL23AP53    | pseudo | -0.668046427 |
| RPS10P15     | pseudo | -0.667873894 |
| LOC101927740 | ncRNA  | -0.667193734 |
| LINC00639    | ncRNA  | -0.666841146 |
| SLC25A5P5    | pseudo | 0.666636224  |



|                       |        |              |
|-----------------------|--------|--------------|
| FAM204BP              | pseudo | -0.666501926 |
| LOC100506351          | ncRNA  | -0.666303523 |
| MGC27345              | ncRNA  | -0.666252164 |
| RHPN1-AS1             | ncRNA  | 0.666235451  |
| CYP4F24P              | pseudo | -0.666075789 |
| LOC645207             | pseudo | 0.665666246  |
| CAP1P1                | pseudo | 0.665387231  |
| FLJ27354              | ncRNA  | -0.665178613 |
| LOC101926956          | ncRNA  | -0.665033087 |
| PGGT1BP2              | pseudo | 0.664802163  |
| HMGNI1P4              | pseudo | 0.66469686   |
| COX7BP1               | pseudo | 0.664663703  |
| LOC402715             | pseudo | 0.664641353  |
| RPL10AP8              | pseudo | -0.66461803  |
| LOC100419844          | pseudo | -0.664158839 |
| LOC101927724          | ncRNA  | -0.662829071 |
| ST13P19               | pseudo | -0.662396838 |
| AGAP1-IT1             | ncRNA  | 0.662282157  |
| MRPL40P1              | pseudo | 0.662183087  |
| PPIAP29               | pseudo | 0.661891385  |
| LOC101929465          | ncRNA  | -0.661669227 |
| AQP7P1                | pseudo | -0.661657939 |
| LOC101927426          | ncRNA  | -0.661415288 |
| LOC101928061          | ncRNA  | -0.660654437 |
| KRT18P18              | pseudo | 0.660152308  |
| ZSCAN12P1             | pseudo | 0.659420372  |
| SNX18P12              | pseudo | -0.659232048 |
| LOC101929096          | ncRNA  | 0.658263522  |
| BVES-AS1              | ncRNA  | -0.65822337  |
| HSPD1P6               | pseudo | 0.658033139  |
| LOC442318             | pseudo | 0.657552535  |
| LOC392264             | pseudo | -0.657391655 |
| LOC100419622          | pseudo | 0.657351136  |
| LOC101929157          | ncRNA  | -0.657197536 |
| COX5BP7               | pseudo | -0.656479064 |
| TSPY26P               | pseudo | -0.656292238 |
| LOC101928731          | ncRNA  | -0.655999349 |
| OR2S1P                | pseudo | -0.655867849 |
| ADD3-AS1              | ncRNA  | -0.655108151 |
| C7orf13               | ncRNA  | 0.654638457  |
| LOC101928916          | ncRNA  | -0.654616248 |
| LOC100499484-C9ORF174 | ncRNA  | -0.654497934 |
| LOC101928754          | ncRNA  | -0.654449841 |
| LOC100132073          | pseudo | 0.653898209  |
| ANKRD20A12P           | pseudo | -0.653849689 |
| CASP16                | pseudo | 0.65378588   |
| CSPG4P5               | pseudo | -0.652995028 |
| KRTAP5-AS1            | ncRNA  | 0.652472257  |
| RPS25P6               | pseudo | -0.652431431 |
| LOC101054525          | ncRNA  | -0.652269792 |
| LOC256374             | pseudo | 0.651873429  |
| GLRXP1                | pseudo | 0.651870486  |
| LOC100132077          | ncRNA  | -0.651708792 |
| LOC101928319          | ncRNA  | -0.650724059 |

|              |        |              |
|--------------|--------|--------------|
| OSTCP4       | pseudo | 0.650561619  |
| SUGT1P1      | pseudo | -0.650556043 |
| RBMS3-AS3    | ncRNA  | -0.650211583 |
| RPL28P5      | pseudo | 0.650192103  |
| C17orf76-AS1 | ncRNA  | -0.649972901 |
| CKS1BP7      | pseudo | 0.64990284   |
| RACGAP1P     | pseudo | 0.649445245  |
| VWFP1        | pseudo | -0.649424791 |
| LOC100505504 | ncRNA  | -0.649290497 |
| LOC100422537 | pseudo | 0.648900116  |
| LOC101927412 | ncRNA  | 0.648778718  |
| LINC01023    | ncRNA  | -0.648532483 |
| PPIAP31      | pseudo | 0.648474453  |
| CAP1P2       | pseudo | 0.648404412  |
| LOC100288911 | ncRNA  | -0.6482401   |
| ALDH1L1-AS2  | ncRNA  | -0.647814549 |
| KRT8P30      | pseudo | 0.646935797  |
| PGM5-AS1     | ncRNA  | -0.646476545 |
| LOC131055    | pseudo | 0.646245206  |
| MRPS21P3     | pseudo | 0.646016441  |
| KRT18P21     | pseudo | 0.645655124  |
| GAPDHP38     | pseudo | 0.645650696  |
| LOC101929127 | ncRNA  | -0.645545516 |
| LINC00982    | ncRNA  | -0.644958979 |
| LOC642550    | pseudo | 0.644867743  |
| LOC100288211 | pseudo | 0.644715838  |
| RPL7P10      | pseudo | 0.644708097  |
| LOC100996609 | ncRNA  | -0.644617876 |
| TARBP2P      | pseudo | 0.644441816  |
| PPIAP21      | pseudo | 0.644262741  |
| ADAMTS9-AS2  | ncRNA  | -0.643373566 |
| HNRNPA3P1    | pseudo | 0.642831643  |
| KRT18P16     | pseudo | 0.642803541  |
| PSMA6P1      | pseudo | 0.642432083  |
| LINC00574    | ncRNA  | -0.642380817 |
| LOC101929150 | ncRNA  | -0.642246634 |
| LOC100289143 | pseudo | 0.642215582  |
| RPL26P33     | pseudo | -0.64184078  |
| OR7E62P      | pseudo | 0.641621452  |
| RPL9P17      | pseudo | -0.641389014 |
| LOC644172    | pseudo | -0.641220721 |
| LINC00924    | ncRNA  | -0.64080871  |
| LOC101927263 | ncRNA  | -0.640801396 |
| LOC641378    | pseudo | 0.640333102  |
| LOC101928836 | ncRNA  | -0.640230529 |
| YWHAZP6      | pseudo | 0.639249612  |
| C1orf200     | ncRNA  | 0.639102778  |
| UNC93B7      | pseudo | 0.638603208  |
| TRHDE-AS1    | ncRNA  | -0.638503196 |
| LOC101929313 | ncRNA  | -0.638034782 |
| RPLP2P2      | pseudo | -0.637748922 |
| MGC72080     | pseudo | 0.637640239  |
| FAM27A       | ncRNA  | -0.637493958 |
| ACTBP12      | pseudo | 0.637474982  |

|              |        |              |
|--------------|--------|--------------|
| FLJ13197     | pseudo | -0.637268163 |
| KNOP1P4      | pseudo | 0.636847672  |
| FDPSP8       | pseudo | 0.636804136  |
| LOC100289371 | pseudo | 0.636632281  |
| LOC100128593 | ncRNA  | -0.636038619 |
| EIF4BP6      | pseudo | -0.635636666 |
| KRT8P42      | pseudo | 0.635594079  |
| CCT6P4       | pseudo | 0.635409929  |
| LOC101928363 | ncRNA  | -0.635348369 |
| LOC441644    | pseudo | 0.634709501  |
| LOC101928923 | ncRNA  | -0.632760921 |
| ENO1P4       | pseudo | -0.632611685 |
| HSPD1P5      | pseudo | 0.632333073  |
| PARP1P1      | pseudo | 0.631957057  |
| LOC100505495 | ncRNA  | -0.631787078 |
| LOC400750    | pseudo | 0.63156739   |
| FBXL19-AS1   | ncRNA  | 0.631493803  |
| EIF4A1P5     | pseudo | 0.631476324  |
| GAPDHP44     | pseudo | 0.631409985  |
| GAPDHP40     | pseudo | 0.631386786  |
| GUCY1B2      | pseudo | 0.631281156  |
| LOC388906    | pseudo | 0.630769334  |
| HNRNPA1P7    | pseudo | -0.630634621 |
| LOC442272    | pseudo | 0.630035707  |
| LOC101929682 | pseudo | -0.629955106 |
| CBX3P2       | pseudo | -0.629944839 |
| USP32P1      | pseudo | -0.629925569 |
| NDUFS5P7     | pseudo | 0.6298965    |
| LOC101928373 | ncRNA  | -0.62927927  |
| LINC00636    | ncRNA  | -0.629106673 |
| PGM5P2       | pseudo | -0.629048019 |
| RASSF8-AS1   | ncRNA  | -0.628996915 |
| KRT8P33      | pseudo | 0.628806194  |
| PSMD2P1      | pseudo | 0.628802133  |
| LOC101927150 | ncRNA  | 0.628625438  |
| LOC100216479 | ncRNA  | -0.62830212  |
| LOC101928230 | ncRNA  | -0.628171592 |
| LOC643792    | pseudo | -0.627922785 |
| LINC00908    | ncRNA  | -0.627760327 |
| LOC100129847 | pseudo | 0.627320351  |
| RNASEH1P1    | pseudo | 0.626974996  |
| LOC100419773 | pseudo | -0.626767325 |
| LOC101929089 | ncRNA  | -0.625650967 |
| DNAJC27-AS1  | ncRNA  | -0.625575967 |
| HOXC-AS1     | ncRNA  | -0.625511687 |
| LOC100996286 | ncRNA  | 0.625049959  |
| LOC100506725 | ncRNA  | -0.624610936 |
| CKMT2-AS1    | ncRNA  | -0.624222076 |
| AOC4P        | pseudo | -0.624019367 |
| PKMP3        | pseudo | -0.623496703 |
| RPL5P28      | pseudo | -0.622962893 |
| RPL28P3      | pseudo | 0.622934525  |
| LOC101927524 | ncRNA  | -0.622796107 |
| LOC645754    | pseudo | 0.622284096  |

|              |        |              |
|--------------|--------|--------------|
| GAPDHP25     | pseudo | 0.621968817  |
| HMG2P15      | pseudo | -0.621915324 |
| WHAMMP1      | pseudo | -0.62184252  |
| LOC100292290 | pseudo | 0.621617383  |
| LOC100131425 | pseudo | 0.621605765  |
| HOTAIRM1     | ncRNA  | -0.62134606  |
| LOC138971    | pseudo | 0.621178881  |
| LOC100420848 | pseudo | 0.621026685  |
| LINC00858    | ncRNA  | 0.620433337  |
| CHCHD2P8     | pseudo | 0.620229452  |
| ST8SIA6-AS1  | ncRNA  | 0.619956301  |
| KRT18P4      | pseudo | 0.619872525  |
| HCG22        | ncRNA  | -0.619838812 |
| LOC101927311 | ncRNA  | -0.619654205 |
| LOC100422242 | pseudo | -0.619636716 |
| LOC101928284 | ncRNA  | -0.619614439 |
| LOC284578    | ncRNA  | -0.619518859 |
| GAPDHP2      | pseudo | 0.618903493  |
| CRSP8P       | pseudo | 0.618802422  |
| CYP4F23P     | pseudo | 0.618553927  |
| LOC101927992 | ncRNA  | 0.618396248  |
| SDAD1P1      | pseudo | -0.618209776 |
| CPB2-AS1     | ncRNA  | -0.618168564 |
| LINC00472    | ncRNA  | -0.617807704 |
| LINC00839    | ncRNA  | -0.617369606 |
| LOC101929523 | ncRNA  | -0.617241544 |
| LOC101927511 | ncRNA  | -0.616989916 |
| LOC101929095 | ncRNA  | -0.616255095 |
| GAPDHP73     | pseudo | 0.615810539  |
| ANP32BP3     | pseudo | 0.615376602  |
| LOC100996727 | pseudo | 0.614807865  |
| LOC100130992 | ncRNA  | -0.614537727 |
| KRT8P31      | pseudo | 0.614318488  |
| VIMP1        | pseudo | -0.614249347 |
| GAPDHP31     | pseudo | 0.614223375  |
| LOC731755    | pseudo | 0.613894944  |
| C10orf85     | ncRNA  | 0.613220361  |
| LOC101928307 | ncRNA  | -0.613068968 |
| LOC101929484 | ncRNA  | 0.612916776  |
| LOC339524    | ncRNA  | -0.612731191 |
| DPH6-AS1     | ncRNA  | -0.612352012 |
| LOC100420252 | pseudo | 0.611801873  |
| PSIP1P1      | pseudo | -0.611582106 |
| LOC101928698 | ncRNA  | -0.610865414 |
| SDHDP6       | pseudo | -0.61071153  |
| LOC100422473 | pseudo | 0.610618698  |
| LOC100505774 | ncRNA  | -0.610590014 |
| OSTF1P1      | pseudo | 0.610572547  |
| LOC440311    | pseudo | -0.609791942 |
| TPTE2P5      | pseudo | -0.609690235 |
| SUMO2P6      | pseudo | 0.60964976   |
| LINC00987    | ncRNA  | -0.609558011 |
| LOC100996251 | ncRNA  | -0.608728197 |
| HSPE1P2      | pseudo | 0.608477784  |

|               |        |              |
|---------------|--------|--------------|
| LINC00663     | ncRNA  | -0.608370891 |
| GAPDHP72      | pseudo | 0.608258717  |
| LOC101928806  | ncRNA  | -0.607840532 |
| LOC100133073  | pseudo | -0.6061288   |
| LOC645937     | pseudo | 0.606104926  |
| LAMB2P1       | pseudo | -0.605947313 |
| LINC00668     | ncRNA  | 0.605549133  |
| RPS6P13       | pseudo | -0.605542561 |
| SUGT1P3       | pseudo | -0.605395563 |
| RPL37AP5      | pseudo | -0.604942257 |
| IL10RB-AS1    | ncRNA  | 0.604773971  |
| KRT8P8        | pseudo | 0.604746393  |
| PSMA6P2       | pseudo | 0.604738386  |
| LOC100129682  | pseudo | -0.604276968 |
| KRT8P47       | pseudo | 0.604109375  |
| LOC388248     | pseudo | -0.603496403 |
| EIF3KP2       | pseudo | 0.603413368  |
| MTHFD2P5      | pseudo | 0.603403292  |
| LOC101927070  | ncRNA  | 0.603398569  |
| RPL21P80      | pseudo | -0.603067731 |
| LINC00671     | ncRNA  | -0.602871904 |
| UG0898H09     | ncRNA  | -0.602790978 |
| KRT8P7        | pseudo | 0.602578148  |
| C6orf123      | ncRNA  | -0.60212744  |
| FAM66E        | ncRNA  | -0.602120141 |
| LOC100506289  | ncRNA  | -0.601278625 |
| RPL7AP28      | pseudo | -0.60116199  |
| LOC101929285  | ncRNA  | -0.600408384 |
| H2AFVP1       | pseudo | 0.600078716  |
| APCDD1L-AS1   | ncRNA  | -0.599924262 |
| ZNF670-ZNF695 | ncRNA  | 0.599702371  |
| LOC100130909  | pseudo | 0.599138946  |
| NBEAP3        | pseudo | -0.598814338 |
| LOC729737     | ncRNA  | 0.598591119  |
| TACC1P1       | pseudo | 0.598271246  |
| TBX5-AS1      | ncRNA  | -0.59817929  |
| LOC100507373  | ncRNA  | -0.597890298 |
| LOC100128164  | pseudo | -0.596627046 |
| LOC100996828  | pseudo | -0.595567068 |
| ST13P3        | pseudo | -0.595404254 |
| LOC93202      | pseudo | 0.595232427  |
| LOC100507046  | pseudo | 0.594835456  |
| MT1P1         | pseudo | 0.59462819   |
| KRT8P9        | pseudo | 0.594439295  |
| LOC101928334  | ncRNA  | -0.594292968 |
| LOC645638     | pseudo | 0.594140991  |
| LOC100507557  | ncRNA  | -0.594004736 |
| SNX18P20      | pseudo | -0.593828925 |
| LOC101928264  | ncRNA  | -0.593495252 |
| LOC202319     | pseudo | 0.593345742  |
| LOC729950     | ncRNA  | -0.593032235 |
| LOC101927167  | ncRNA  | 0.592926227  |
| PPIAP13       | pseudo | 0.592700912  |
| SACS-AS1      | ncRNA  | -0.592532874 |

|              |        |              |
|--------------|--------|--------------|
| LOC100420067 | pseudo | -0.591976727 |
| SLC25A5P2    | pseudo | 0.591906427  |
| LINC00899    | ncRNA  | -0.591834936 |
| RPS3AP22     | pseudo | -0.590775888 |
| LOC101929387 | ncRNA  | -0.5907143   |
| LOC101927617 | ncRNA  | -0.590654254 |
| LINC00239    | ncRNA  | 0.590645647  |
| ALDOAP2      | pseudo | 0.590614929  |
| LOC101928117 | ncRNA  | -0.590534271 |
| LOC644661    | pseudo | 0.590143717  |
| LINC00597    | ncRNA  | -0.589934901 |
| HMG1P8       | pseudo | 0.589273868  |
| LOC100862682 | pseudo | 0.588505534  |
| NEK2P4       | pseudo | 0.588262307  |
| SPATA20P1    | pseudo | 0.58813675   |
| TNXA         | pseudo | -0.587807729 |
| LOC101929432 | ncRNA  | -0.587648383 |
| CASP1P3      | pseudo | 0.58749335   |
| ACTN1-AS1    | ncRNA  | 0.587113323  |
| LOC100506674 | ncRNA  | -0.587065893 |
| RPL18AP8     | pseudo | 0.586966215  |
| RPL3P3       | pseudo | -0.586742509 |
| CCT7P1       | pseudo | 0.58670713   |
| LOC101928707 | ncRNA  | 0.586550588  |
| LOC100507283 | ncRNA  | -0.586501155 |
| NDUFA9P1     | pseudo | 0.586182241  |
| HNRNPA1P27   | pseudo | -0.585645407 |
| DNM1P46      | pseudo | -0.585574679 |
| RPL26P6      | pseudo | -0.585463817 |
| KGFLP2       | pseudo | -0.585202156 |
| LOC101928409 | ncRNA  | -0.585086119 |
| GAPDHP63     | pseudo | 0.58443798   |
| LOC101927057 | ncRNA  | -0.584310317 |
| APOC1P1      | pseudo | 0.583963789  |
| LOC643723    | ncRNA  | -0.583821438 |
| PWARSN       | ncRNA  | -0.583365592 |
| LINC00092    | ncRNA  | -0.583063932 |
| UBXN7-AS1    | ncRNA  | -0.582730945 |
| HMGB2P1      | pseudo | 0.582703142  |
| LOC101928919 | ncRNA  | 0.581949889  |
| LOC100996427 | ncRNA  | -0.581894434 |
| LINC00086    | ncRNA  | -0.581513419 |
| MTCO2P2      | pseudo | 0.581382625  |
| RPL13AP25    | pseudo | -0.580935589 |
| LOC100421703 | pseudo | 0.580521809  |
| RPS3AP6      | pseudo | -0.58042969  |
| MYLKP1       | pseudo | -0.580273335 |
| ACTBP13      | pseudo | 0.579993603  |
| LOC151276    | pseudo | 0.579874254  |
| LOC101927523 | ncRNA  | 0.579511922  |
| RPS25P3      | pseudo | -0.579234954 |
| LOC677762    | pseudo | 0.579224783  |
| HOXA-AS2     | ncRNA  | -0.579203418 |
| FLJ38576     | ncRNA  | -0.578628355 |

|              |        |              |
|--------------|--------|--------------|
| LOC392787    | pseudo | -0.578432004 |
| ZNF37BP      | pseudo | -0.578215022 |
| ZNF204P      | pseudo | -0.577539672 |
| LOC400685    | ncRNA  | -0.577472114 |
| LOC101928027 | ncRNA  | -0.577366781 |
| RPL21P28     | pseudo | -0.577077505 |
| LOC284196    | pseudo | -0.57580164  |
| BACE1-AS     | ncRNA  | -0.575609921 |
| EIF4BP7      | pseudo | -0.575422244 |
| LOC100996662 | ncRNA  | -0.575306676 |
| LOC101928716 | ncRNA  | 0.575255551  |
| TUBBP1       | pseudo | 0.575234261  |
| LOC101928034 | ncRNA  | -0.575159575 |
| EPB41L4A-AS1 | ncRNA  | -0.574500475 |
| LOC399715    | ncRNA  | -0.574401027 |
| CDIPT-AS1    | ncRNA  | 0.574346165  |
| HSPD1P7      | pseudo | 0.573800062  |
| LOC440173    | ncRNA  | 0.573750585  |
| LOC400456    | ncRNA  | -0.573301055 |
| ATP5F1P5     | pseudo | -0.573106669 |
| PPIAP9       | pseudo | 0.573100851  |
| FLJ26245     | ncRNA  | 0.57308699   |
| OSTCP3       | pseudo | 0.572933546  |
| KRT8P2       | pseudo | 0.572705315  |
| SLC25A5P8    | pseudo | 0.572621105  |
| LOC100507616 | ncRNA  | 0.572360457  |
| KRT8P46      | pseudo | 0.572312386  |
| YTHDF3-AS1   | ncRNA  | 0.572165233  |
| MTMR9LP      | pseudo | -0.57180061  |
| LOC101929480 | ncRNA  | -0.571754475 |
| HNRNPA1P59   | pseudo | -0.571643053 |
| MAPK8IPP     | pseudo | -0.571618436 |
| LOC101929053 | pseudo | 0.57045019   |
| SLC25A21-AS1 | ncRNA  | -0.57024618  |
| KRT8P49      | pseudo | 0.569974949  |
| PCDHB19P     | pseudo | -0.569909901 |
| LOC101928584 | ncRNA  | -0.568658463 |
| LOC101928774 | ncRNA  | -0.568634995 |
| FAM27E3      | ncRNA  | -0.568530292 |
| SNX18P19     | pseudo | -0.568432474 |
| RPL21P75     | pseudo | -0.566232515 |
| DCAF13P3     | pseudo | 0.56616983   |
| HSPD1P1      | pseudo | 0.566157031  |
| LOC653786    | pseudo | 0.565985999  |
| LOC100507165 | ncRNA  | -0.565956581 |
| EIF3J-AS1    | ncRNA  | -0.565448501 |
| CYP4Z2P      | pseudo | 0.565251196  |
| LOC101928141 | ncRNA  | -0.565142183 |
| LOC100419238 | pseudo | -0.564925103 |
| LOC101929158 | ncRNA  | -0.56450553  |
| LOC101928154 | ncRNA  | -0.564457188 |
| FLJ22447     | ncRNA  | 0.564253602  |
| LOC101928370 | ncRNA  | -0.564193401 |
| HMGB3P6      | pseudo | 0.563224523  |

|              |        |              |
|--------------|--------|--------------|
| PPIAP1       | pseudo | 0.563080849  |
| LOC100133612 | ncRNA  | 0.56248467   |
| LOC101927025 | ncRNA  | -0.562229736 |
| RPL9P9       | pseudo | -0.562077033 |
| LOC285084    | ncRNA  | -0.562066729 |
| RPL36P5      | pseudo | -0.562023734 |
| LOC101929600 | ncRNA  | -0.561955365 |
| ATP5EP2      | pseudo | 0.561937863  |
| MYL6P2       | pseudo | 0.561706868  |
| LOC286239    | pseudo | 0.561192893  |
| KRT8P13      | pseudo | 0.559232911  |
| LOC101928172 | ncRNA  | -0.557854629 |
| GOLGA8Q      | pseudo | -0.557598322 |
| RPL34P33     | pseudo | -0.557558044 |
| LOC100507053 | ncRNA  | -0.557199731 |
| EMX20S       | ncRNA  | -0.556654578 |
| LOC101927781 | ncRNA  | -0.556604639 |
| LOC101927258 | ncRNA  | -0.556307835 |
| LOC201651    | pseudo | -0.556185021 |
| LOC100420358 | pseudo | -0.5559945   |
| KRT8P20      | pseudo | 0.555801689  |
| PPIAP19      | pseudo | 0.55571201   |
| LOC101928612 | ncRNA  | -0.555524001 |
| MIRLET7BHG   | ncRNA  | -0.555503525 |
| GAPDHP71     | pseudo | 0.555475627  |
| GMDS-AS1     | ncRNA  | -0.555379347 |
| LOC101927615 | ncRNA  | -0.555374521 |
| LOC101927646 | ncRNA  | -0.554934727 |
| LOC101927405 | ncRNA  | -0.554614341 |
| OR7E13P      | pseudo | -0.554568226 |
| SH3RF3-AS1   | ncRNA  | -0.554439837 |
| LINC00341    | ncRNA  | -0.554250785 |
| LOC101927372 | ncRNA  | -0.553624601 |
| LOC101929744 | pseudo | 0.553563219  |
| LOC101928181 | ncRNA  | -0.553341349 |
| LOC441592    | pseudo | -0.553251439 |
| CYP1B1-AS1   | ncRNA  | -0.553121796 |
| LINC00641    | ncRNA  | -0.552039212 |
| RPS25P1      | pseudo | -0.551907081 |
| ANKRD20A13P  | pseudo | -0.551812222 |
| LOC101929761 | ncRNA  | -0.550956841 |
| LINC00640    | ncRNA  | -0.550630541 |
| CYCSP3       | pseudo | 0.550602929  |
| LOC100287825 | pseudo | -0.550180253 |
| LOC100506548 | ncRNA  | -0.549779692 |
| LOC100505902 | ncRNA  | -0.549311441 |
| LOC100130950 | ncRNA  | -0.5491569   |
| PAICSP4      | pseudo | 0.549138734  |
| RPS4XP11     | pseudo | -0.548848519 |
| LOC101929216 | ncRNA  | -0.548712886 |
| MYL8P        | pseudo | 0.548706643  |
| CECR7        | ncRNA  | -0.548213344 |
| YWHAQP4      | pseudo | 0.54812805   |
| LOC101929667 | ncRNA  | -0.547832893 |



|              |        |              |
|--------------|--------|--------------|
| PPIAP18      | pseudo | 0.547819286  |
| LOC101927980 | ncRNA  | -0.547787871 |
| LOC283440    | ncRNA  | -0.547523731 |
| GJA1P1       | pseudo | -0.546783347 |
| TUBBP6       | pseudo | 0.546602326  |
| KRT8P17      | pseudo | 0.545846088  |
| NFE2L3P1     | pseudo | 0.545765202  |
| KRT8P3       | pseudo | 0.545473782  |
| A2MP1        | pseudo | -0.545251111 |
| LOC100130691 | ncRNA  | -0.545098888 |
| LOC101928292 | ncRNA  | 0.545062706  |
| LOC389727    | pseudo | 0.54446563   |
| SAR1AP1      | pseudo | 0.544232783  |
| LINC00032    | ncRNA  | -0.543955765 |
| LOC440063    | pseudo | 0.543757903  |
| XGPY2        | pseudo | -0.543016267 |
| LOC645680    | pseudo | 0.542946985  |
| LOC101929204 | ncRNA  | -0.541886516 |
| LOC101927463 | ncRNA  | -0.541791711 |
| KCNJ2-AS1    | ncRNA  | -0.541534366 |
| LOC100129973 | ncRNA  | -0.541326254 |
| LOC101927486 | ncRNA  | -0.540813263 |
| HOXA10-HOXA9 | ncRNA  | -0.540557238 |
| LOC101927550 | ncRNA  | -0.540517752 |
| GAPDHP65     | pseudo | 0.540261075  |
| MIR143HG     | ncRNA  | -0.539907058 |
| DEPDC1P2     | pseudo | 0.539658918  |
| WDR86-AS1    | ncRNA  | -0.538954618 |
| LOC101927151 | ncRNA  | 0.538535569  |
| LOC100506421 | ncRNA  | -0.538046808 |
| FZD10-AS1    | ncRNA  | -0.537766643 |
| NUDT19P5     | pseudo | -0.537710222 |
| LOC100129316 | ncRNA  | -0.536761597 |
| LOC101927566 | ncRNA  | -0.536515405 |
| HNRNPA3P7    | pseudo | -0.536509844 |
| SLC2A3P2     | pseudo | -0.536294365 |
| LOC101929726 | ncRNA  | -0.535682905 |
| MTAPP2       | pseudo | 0.535535967  |
| KRT42P       | pseudo | -0.535307716 |
| RPS14P5      | pseudo | -0.534987574 |
| LINC01016    | ncRNA  | -0.534502072 |
| LOC101928290 | ncRNA  | -0.533698455 |
| RPL19P11     | pseudo | 0.533628297  |
| LOC101928515 | ncRNA  | -0.533480136 |
| LOC729177    | ncRNA  | -0.533467339 |
| LOC101928171 | ncRNA  | -0.5332943   |
| LOC101926935 | ncRNA  | -0.532989266 |
| RPS14P10     | pseudo | -0.53251413  |
| LOC100505498 | ncRNA  | -0.532372509 |
| MEG3         | ncRNA  | -0.531673789 |
| KRT16P5      | pseudo | -0.531139133 |
| LOC100507006 | ncRNA  | -0.531007278 |
| PCOLCE-AS1   | ncRNA  | -0.530129662 |
| CACNA1G-AS1  | ncRNA  | -0.529091176 |

|                |        |              |
|----------------|--------|--------------|
| KRT17P3        | pseudo | -0.528893459 |
| LINC00969      | ncRNA  | -0.528864959 |
| LINC00659      | ncRNA  | 0.528472592  |
| FTOP1          | pseudo | -0.527990193 |
| ALOX15P2       | pseudo | -0.527789737 |
| LOC101929722   | ncRNA  | -0.527492152 |
| LOC101927573   | ncRNA  | 0.526636247  |
| RPS4XP1        | pseudo | -0.526570895 |
| PHC1P1         | pseudo | -0.526488264 |
| HSPA8P15       | pseudo | -0.525672893 |
| CXCR2P1        | pseudo | 0.525661418  |
| LOC101928080   | ncRNA  | -0.525340631 |
| LOC100421093   | pseudo | 0.525134438  |
| LOC391073      | pseudo | 0.525089762  |
| HNRNPA1P21     | pseudo | 0.52438633   |
| LOC101928223   | ncRNA  | -0.523316739 |
| RRM2P3         | pseudo | 0.523041641  |
| ZNF300P1       | pseudo | -0.52294601  |
| KRT16P4        | pseudo | -0.522569482 |
| LOC101928238   | ncRNA  | -0.522312023 |
| LOC101927010   | ncRNA  | 0.522193621  |
| LOC387720      | ncRNA  | -0.521901648 |
| LOC101060632   | ncRNA  | -0.521778966 |
| JHDM1D-AS1     | ncRNA  | 0.521617127  |
| LOC100506047   | ncRNA  | -0.521570241 |
| LOC440600      | ncRNA  | 0.52107777   |
| RPL13P12       | pseudo | -0.520254039 |
| SERTAD4-AS1    | ncRNA  | -0.519175961 |
| LOC101929345   | ncRNA  | -0.519077143 |
| ADORA2A-AS1    | ncRNA  | -0.518076878 |
| LOC101929729   | ncRNA  | -0.517631312 |
| ENPP7P2        | pseudo | -0.517511914 |
| LOC100996549   | ncRNA  | -0.516556858 |
| BCRP3          | pseudo | 0.515217705  |
| WEE2-AS1       | ncRNA  | -0.51483675  |
| SLC25A39P1     | pseudo | 0.513971307  |
| LINC00936      | ncRNA  | -0.513870523 |
| RPL21P19       | pseudo | -0.51348068  |
| SNX18P23       | pseudo | -0.51301132  |
| LOC101927106   | ncRNA  | -0.512352478 |
| COX8BP         | pseudo | -0.512308451 |
| LOC100533733   | pseudo | -0.51077467  |
| LOC100287856   | pseudo | 0.509844625  |
| TINCR          | ncRNA  | 0.509704152  |
| TPT1-AS1       | ncRNA  | -0.509577968 |
| PLA2G12AP1     | pseudo | 0.509475165  |
| ALDOAP1        | pseudo | 0.509042229  |
| LOC101929291   | ncRNA  | -0.508676457 |
| FCGR1C         | pseudo | 0.507772745  |
| PPT2-EGFL8     | ncRNA  | -0.507428212 |
| ARHGAP19-SLIT1 | ncRNA  | -0.507112453 |
| LOC101927384   | ncRNA  | -0.506888645 |
| LOC286442      | ncRNA  | 0.506810202  |
| SLC25A5P1      | pseudo | 0.506448538  |

|              |        |              |
|--------------|--------|--------------|
| LOC101927373 | ncRNA  | -0.506146743 |
| LOC100130887 | ncRNA  | -0.505836577 |
| HSD52        | ncRNA  | -0.505003607 |
| LOC441887    | pseudo | 0.504658796  |
| LOC101927825 | ncRNA  | -0.504490924 |
| LINC00460    | ncRNA  | 0.504342716  |
| RPL15P17     | pseudo | -0.503738033 |
| LOC101928281 | ncRNA  | 0.502797632  |
| RPL34P1      | pseudo | -0.502635397 |
| LINC00173    | ncRNA  | -0.502069818 |
| MBL1P        | pseudo | 0.501608329  |
| LOC100132352 | pseudo | -0.500923014 |
| LOC101929228 | ncRNA  | -0.500669755 |
| LOC100505989 | ncRNA  | 0.500474234  |
| LINC00673    | ncRNA  | 0.499582047  |
| LOC100129184 | pseudo | -0.499040907 |
| USP27X-AS1   | ncRNA  | -0.498995122 |
| FEN1P1       | pseudo | 0.498535868  |
| LOC392285    | pseudo | 0.498426382  |
| SEPHS1P4     | pseudo | 0.498217849  |
| APOC4-APOC2  | ncRNA  | 0.498200328  |
| JAZF1-AS1    | ncRNA  | -0.496100266 |
| HCG23        | ncRNA  | -0.4959023   |
| CCT5P2       | pseudo | 0.494869203  |
| SNX18P13     | pseudo | -0.494757047 |
| RPL27P6      | pseudo | -0.494632685 |
| LOC101928199 | ncRNA  | -0.494110643 |
| LINC00968    | ncRNA  | -0.493984266 |
| RPL19P20     | pseudo | 0.49356171   |
| LOC100507560 | ncRNA  | -0.493543434 |
| LOC100421281 | pseudo | 0.493238221  |
| LOC100505547 | ncRNA  | 0.492316229  |
| LPAL2        | pseudo | -0.491499471 |
| KRT8P45      | pseudo | 0.490985355  |
| DNM1P35      | pseudo | -0.49097849  |
| LINC00989    | ncRNA  | -0.490774476 |
| LOC101929713 | ncRNA  | -0.490083519 |
| LOC284009    | ncRNA  | -0.490034877 |
| LOC100421587 | pseudo | -0.489978869 |
| LOC101927904 | ncRNA  | -0.489905047 |
| LOC100128885 | ncRNA  | 0.489881257  |
| LOC101928315 | pseudo | -0.489598867 |
| LOC101927366 | ncRNA  | -0.489552356 |
| KRT8P37      | pseudo | 0.489447375  |
| LOC645434    | ncRNA  | -0.487868156 |
| EIF4BP5      | pseudo | -0.48768566  |
| RPL19P2      | pseudo | 0.486757637  |
| PWAR5        | ncRNA  | -0.485992488 |
| LOC101927351 | ncRNA  | 0.485250348  |
| LOC101927099 | ncRNA  | -0.484651705 |
| RPL19P5      | pseudo | 0.484234526  |
| HNRNPA1P10   | pseudo | -0.483148256 |
| RCC2P6       | pseudo | 0.483074687  |
| RPSAP41      | pseudo | -0.48305418  |

|              |        |              |
|--------------|--------|--------------|
| MTND2P13     | pseudo | 0.482598624  |
| LOC100527947 | pseudo | 0.482554071  |
| LOC101927445 | ncRNA  | -0.48242769  |
| RRM2P2       | pseudo | 0.482162523  |
| LOC101929398 | ncRNA  | -0.481115748 |
| GAPDHP68     | pseudo | 0.48102755   |
| LOC101927418 | ncRNA  | -0.480317428 |
| LOC101928391 | ncRNA  | -0.480272874 |
| UCA1         | ncRNA  | 0.480267629  |
| UNC93B8      | pseudo | 0.479520671  |
| CYB5AP3      | pseudo | 0.478956442  |
| LOC202227    | pseudo | 0.478884176  |
| LOC100996635 | ncRNA  | -0.47872873  |
| COX17P1      | pseudo | 0.478315821  |
| DGUOK-AS1    | ncRNA  | 0.477633105  |
| LOC100505635 | ncRNA  | -0.477546159 |
| PPIAP3       | pseudo | 0.477302183  |
| P2RX6P       | pseudo | -0.476344146 |
| LOC101929767 | ncRNA  | -0.474808664 |
| MYO5BP1      | pseudo | 0.474236852  |
| ANKRD20A16P  | pseudo | 0.473913154  |
| MYCNOS       | ncRNA  | 0.473525905  |
| LOC101927244 | ncRNA  | 0.473029208  |
| LINC00882    | ncRNA  | -0.472796954 |
| Clorf140     | ncRNA  | -0.472661859 |
| LOC101929494 | ncRNA  | -0.472409675 |
| FAM66D       | ncRNA  | -0.472337017 |
| LOC101927495 | ncRNA  | -0.471762053 |
| GOLGA6L5     | pseudo | -0.471723227 |
| LOC100421311 | pseudo | 0.471099553  |
| LOC100129603 | ncRNA  | -0.470992189 |
| LOC100419620 | pseudo | 0.470764814  |
| LOC440792    | pseudo | 0.470631615  |
| RPL19P3      | pseudo | 0.470007923  |
| ISCA1P4      | pseudo | 0.469901876  |
| HMG1P30      | pseudo | 0.469780857  |
| LOC101928212 | ncRNA  | -0.469457111 |
| HMGB3P10     | pseudo | -0.469281672 |
| PPP1R26P1    | pseudo | -0.468996083 |
| PSMB3P       | pseudo | 0.46881366   |
| LOC100129693 | pseudo | 0.467732631  |
| LINC01013    | ncRNA  | -0.467656082 |
| RPL19P18     | pseudo | 0.46733973   |
| PGK1P1       | pseudo | 0.465985992  |
| LOC100420776 | pseudo | -0.464668335 |
| RPL21P46     | pseudo | -0.463812897 |
| LOC100506895 | ncRNA  | -0.463294977 |
| RPL19P21     | pseudo | 0.463294273  |
| MLLT10P1     | pseudo | -0.462204932 |
| KARSP2       | pseudo | -0.461854939 |
| LOC101926988 | ncRNA  | 0.461481784  |
| LOC390203    | pseudo | 0.461394519  |
| LOC101929650 | ncRNA  | -0.461202804 |
| DEPDC1P1     | pseudo | 0.460850227  |

|              |        |              |
|--------------|--------|--------------|
| KRT8P11      | pseudo | 0.460648434  |
| LOC101927268 | ncRNA  | -0.460418876 |
| LOC100507661 | ncRNA  | -0.459804243 |
| RPL19P16     | pseudo | 0.459420625  |
| PRR26        | ncRNA  | -0.459050177 |
| LOC283299    | ncRNA  | -0.45756411  |
| LOC728554    | pseudo | 0.457328646  |
| SAA3P        | pseudo | -0.456323156 |
| CLEC4GP1     | pseudo | -0.456267035 |
| HSBP1P2      | pseudo | 0.454343817  |
| LINC00707    | ncRNA  | -0.453527808 |
| SLC26A4-AS1  | ncRNA  | -0.453142069 |
| LOC101927722 | ncRNA  | 0.452210129  |
| BRE-AS1      | ncRNA  | -0.45218107  |
| RPL21P119    | pseudo | -0.452111744 |
| LOC100506551 | ncRNA  | -0.451213057 |
| LOC101928352 | ncRNA  | -0.451205937 |
| LOC101927170 | ncRNA  | -0.450296157 |
| LOC729674    | pseudo | 0.449487449  |
| SLC25A5P3    | pseudo | 0.44905496   |
| LOC100506700 | ncRNA  | -0.447889567 |
| LOC100420787 | pseudo | -0.447151369 |
| HNRNPA1P77   | pseudo | 0.446995016  |
| ACTBP1       | pseudo | 0.446801404  |
| FAM27E2      | ncRNA  | -0.445132722 |
| LOC101927344 | ncRNA  | 0.44478055   |
| LOC401463    | ncRNA  | -0.444760028 |
| ALOX12P2     | pseudo | -0.444543912 |
| LOC101929739 | ncRNA  | -0.444306193 |
| LOC100527946 | pseudo | 0.444304978  |
| LGALS17A     | pseudo | 0.444021801  |
| LOC100505622 | ncRNA  | 0.443796518  |
| LOC101928958 | ncRNA  | 0.442949742  |
| LINC00669    | ncRNA  | 0.441735645  |
| RPL19P12     | pseudo | 0.440844672  |
| C4orf6       | ncRNA  | 0.438645158  |
| LOC100996301 | ncRNA  | 0.437797949  |
| LOC101927383 | ncRNA  | -0.437528926 |
| LINC00702    | ncRNA  | -0.437215288 |
| RPS24P11     | pseudo | -0.43677077  |
| UGT2B25P     | pseudo | 0.436217218  |
| LOC100505920 | ncRNA  | 0.435973682  |
| LINC00162    | ncRNA  | -0.435456073 |
| PCNA-AS1     | ncRNA  | 0.434819618  |
| LOC101927741 | ncRNA  | -0.434800194 |
| HNRNPA1P4    | pseudo | -0.434236035 |
| LINC00890    | ncRNA  | -0.432709404 |
| LOC100129137 | pseudo | -0.432283658 |
| GAPDHP46     | pseudo | 0.431892705  |
| IGLL3P       | pseudo | 0.431481723  |
| FAM21D       | pseudo | -0.430200892 |
| CYP4F43P     | pseudo | 0.430042167  |
| ANKRD20A15P  | pseudo | -0.429922475 |
| FAM95C       | ncRNA  | -0.429109804 |

|              |        |              |
|--------------|--------|--------------|
| COX6CP1      | pseudo | 0.427991366  |
| RPL36AP45    | pseudo | 0.42688301   |
| LOC101928303 | ncRNA  | -0.426692076 |
| LINC00511    | ncRNA  | 0.426258204  |
| LINC00942    | ncRNA  | -0.425743132 |
| FLJ37644     | ncRNA  | -0.425171715 |
| GAPDHP67     | pseudo | 0.424701603  |
| LINC00958    | ncRNA  | -0.424171682 |
| HIST2H2BC    | pseudo | 0.424089362  |
| MIR210HG     | ncRNA  | 0.421545418  |
| RPL7AP54     | pseudo | 0.419598461  |
| LOC101928296 | pseudo | 0.418637445  |
| LOC285889    | ncRNA  | -0.418478267 |
| DNM1P43      | pseudo | -0.418459656 |
| KRT8P35      | pseudo | 0.418398327  |
| LOC643219    | pseudo | -0.417786129 |
| LOC100129931 | ncRNA  | 0.417442784  |
| FAM66B       | ncRNA  | -0.417238218 |
| LOC285593    | ncRNA  | -0.417211218 |
| C1orf191     | ncRNA  | -0.416988144 |
| ATP5JP1      | pseudo | 0.416091749  |
| FRMD6-AS2    | ncRNA  | -0.415389657 |
| LOC646168    | pseudo | -0.41523808  |
| INGX         | pseudo | -0.414254882 |
| RPS20P24     | pseudo | 0.414025989  |
| LOC100289473 | pseudo | -0.41330365  |
| ANKRD20A7P   | pseudo | -0.413195787 |
| LOC101929525 | ncRNA  | -0.411949997 |
| LINC00466    | ncRNA  | 0.411798698  |
| GATA3-AS1    | ncRNA  | -0.411744155 |
| C21orf88     | ncRNA  | -0.411458242 |
| SNORA74B     | snoRNA | -0.410857878 |
| IGKV10R-2    | pseudo | 0.409920753  |
| LOC101927834 | ncRNA  | -0.409694925 |
| LOC101928845 | ncRNA  | 0.408462867  |
| LOC642496    | pseudo | 0.408300488  |
| GRIK1-AS1    | ncRNA  | -0.408158459 |
| LOC729732    | ncRNA  | -0.407768647 |
| LOC101927536 | ncRNA  | -0.407274439 |
| LINC00645    | ncRNA  | -0.404691313 |
| LINC00842    | ncRNA  | -0.404294815 |
| RPL21P53     | pseudo | -0.403922431 |
| LINC01006    | ncRNA  | -0.403506653 |
| RPL21P42     | pseudo | -0.403480877 |
| FAM201A      | ncRNA  | -0.402602561 |
| LOC100996622 | pseudo | -0.40216782  |
| LOC101929689 | ncRNA  | -0.401705413 |
| LOC101928898 | ncRNA  | -0.400334357 |
| ELOVL2-AS1   | ncRNA  | -0.400285487 |
| MGC45922     | ncRNA  | 0.399592688  |
| KRT8P5       | pseudo | 0.397870575  |
| MT1JP        | pseudo | -0.397614461 |
| LOC101928115 | ncRNA  | -0.396908577 |
| FEZF1-AS1    | ncRNA  | 0.396887603  |

|               |        |              |
|---------------|--------|--------------|
| LOC101927965  | ncRNA  | -0.396210364 |
| LINC00189     | ncRNA  | 0.395958647  |
| ALG1L3P       | pseudo | 0.395938062  |
| GAPDHP64      | pseudo | 0.395714043  |
| CPP           | pseudo | 0.39493764   |
| LOC285484     | ncRNA  | 0.394863023  |
| LOC100421541  | pseudo | 0.392764312  |
| LOC101929447  | ncRNA  | 0.39255245   |
| DKFZp434J0226 | ncRNA  | 0.391343199  |
| FEM1AP1       | pseudo | -0.391258428 |
| LOC389033     | pseudo | -0.390128657 |
| LINC00284     | ncRNA  | -0.38807915  |
| LINC00602     | ncRNA  | 0.38805454   |
| LOC101928262  | ncRNA  | -0.387814016 |
| LOC101928474  | ncRNA  | -0.387772394 |
| LOC101927703  | ncRNA  | -0.387661939 |
| LOC283177     | ncRNA  | -0.387604075 |
| LOC100131289  | ncRNA  | -0.387061405 |
| LOC101929130  | ncRNA  | -0.386346649 |
| LOC101926900  | ncRNA  | 0.386346237  |
| LOC101928581  | ncRNA  | -0.385072844 |
| LOC100506088  | ncRNA  | 0.384425843  |
| TUBB8P11      | pseudo | 0.384369454  |
| WT1-AS        | ncRNA  | 0.384366354  |
| IMPDH1P7      | pseudo | 0.384040818  |
| PRSS3P1       | pseudo | -0.383330284 |
| LOC101928410  | ncRNA  | 0.37975467   |
| LOC128136     | pseudo | 0.378883171  |
| NAMA          | ncRNA  | -0.378259073 |
| KLKP1         | pseudo | 0.378177939  |
| LOC101929513  | ncRNA  | 0.377203364  |
| BMS1P2        | pseudo | -0.377089448 |
| LINC00461     | ncRNA  | 0.376721974  |
| LOC152225     | ncRNA  | 0.376612156  |
| CCRL1P1       | pseudo | -0.376199987 |
| IGHV4-55      | pseudo | 0.375215036  |
| LOC101928519  | ncRNA  | -0.374804867 |
| RMST          | ncRNA  | -0.370312083 |
| SNX18P3       | pseudo | -0.369972342 |
| MICF          | pseudo | -0.369968672 |
| GVINP2        | pseudo | -0.369822357 |
| LOC101929309  | ncRNA  | 0.369025278  |
| LOC100288203  | pseudo | -0.361625058 |
| LOC100420777  | pseudo | -0.360617509 |
| LOC339535     | ncRNA  | -0.359392454 |
| LOC158434     | ncRNA  | -0.359115158 |
| LOC101927881  | ncRNA  | -0.357172764 |
| IGHGP         | pseudo | 0.356370463  |
| IGHV7-56      | pseudo | 0.354624136  |
| LOC101927505  | ncRNA  | 0.352608292  |
| ELK2AP        | pseudo | 0.350393697  |
| PRSS3P2       | pseudo | -0.34999351  |
| LOC101928142  | ncRNA  | -0.349512706 |
| LINC00028     | ncRNA  | -0.348425082 |

|               |        |              |
|---------------|--------|--------------|
| LOC100506532  | ncRNA  | -0.347695609 |
| LOC100131347  | pseudo | 0.344936586  |
| LOC101927969  | ncRNA  | -0.34449894  |
| GK3P          | pseudo | 0.342743105  |
| KIAA0125      | ncRNA  | 0.342628547  |
| LOC100506869  | ncRNA  | -0.340128753 |
| IGHV10R15-3   | pseudo | 0.339032353  |
| LOC647002     | pseudo | 0.33719306   |
| C20orf166-AS1 | ncRNA  | -0.335893927 |
| LINC00479     | ncRNA  | -0.334717333 |
| LOC101929040  | ncRNA  | 0.334114032  |
| LOC101927279  | ncRNA  | 0.334028074  |
| MIR4697HG     | ncRNA  | -0.332105803 |
| LOC729296     | ncRNA  | -0.332025592 |
| TCAM1P        | pseudo | 0.331955105  |
| ARHGEF38-IT1  | ncRNA  | 0.33102031   |
| LOC101928358  | ncRNA  | -0.330575449 |
| TPI1P3        | pseudo | 0.32985492   |
| LOC101929511  | ncRNA  | 0.329575475  |
| NOS2P3        | pseudo | 0.328421156  |
| LOC100420852  | pseudo | 0.328364659  |
| LOC100507651  | ncRNA  | 0.328260008  |
| LOC101928375  | ncRNA  | 0.326841477  |
| LOC646794     | pseudo | 0.32413338   |
| CYP4F29P      | pseudo | -0.321868508 |
| SLC25A24P1    | pseudo | 0.320073017  |
| LINC00898     | ncRNA  | 0.319637286  |
| LOC152742     | ncRNA  | -0.319265849 |
| IGHV10R15-2   | pseudo | 0.318999143  |
| PSMC1P7       | pseudo | 0.318950133  |
| LOC390730     | pseudo | 0.316639899  |
| SHFM1P1       | pseudo | 0.316179882  |
| LOC400684     | ncRNA  | 0.315371347  |
| LOC641515     | pseudo | 0.314609872  |
| LOC101929691  | ncRNA  | 0.311064841  |
| LOC101929567  | ncRNA  | 0.307308655  |
| FAM41C        | ncRNA  | -0.306894535 |
| TDGF1P3       | pseudo | -0.301574226 |
| VN1R49P       | pseudo | -0.300890236 |
| LARP1P1       | pseudo | 0.299729951  |
| LOC100506474  | ncRNA  | -0.298156317 |
| LOC100996338  | ncRNA  | 0.297433288  |
| CASC9         | ncRNA  | 0.296679773  |
| LOC101928152  | ncRNA  | 0.293531126  |
| NBPF13P       | pseudo | 0.293035202  |
| LOC285762     | ncRNA  | 0.291612106  |
| PHBP3         | pseudo | 0.290326776  |
| CYP51P3       | pseudo | -0.290271153 |
| RPL21P120     | pseudo | -0.290114229 |
| LOC441806     | pseudo | 0.289739788  |
| LOC643855     | pseudo | 0.286770483  |
| IGLC4         | pseudo | 0.285857355  |
| ATP5G1P5      | pseudo | 0.284665072  |
| LOC100507639  | ncRNA  | 0.284053901  |



|              |        |              |
|--------------|--------|--------------|
| LOC100128834 | pseudo | -0.283772314 |
| LOC101929344 | ncRNA  | -0.283662824 |
| IGHV7-27     | pseudo | 0.283558386  |
| DUSP5P2      | pseudo | 0.282721598  |
| LOC101929272 | ncRNA  | 0.282064995  |
| IGLV3-31     | pseudo | 0.281199867  |
| LOC101927630 | ncRNA  | 0.281100816  |
| LINC00964    | ncRNA  | 0.281100716  |
| LOC100421819 | pseudo | 0.274257414  |
| LOC101929626 | ncRNA  | 0.269678292  |
| GGT3P        | pseudo | 0.267195697  |
| IGHV5-78     | pseudo | 0.265412178  |
| ATP5G1P2     | pseudo | 0.262531909  |
| LOC101928710 | ncRNA  | 0.260462513  |
| LOC100506885 | ncRNA  | 0.259812992  |
| FM09P        | pseudo | 0.256242864  |
| LOC646548    | pseudo | 0.254685323  |
| LOC100652743 | pseudo | 0.254534702  |
| PSMD8P1      | pseudo | 0.250751266  |
| LOC101926892 | ncRNA  | -0.246198105 |
| SNORD3C      | snoRNA | 0.24456984   |
| LOC100507267 | ncRNA  | 0.242274771  |
| HMGB3P24     | pseudo | 0.241778341  |
| LOC100130579 | pseudo | 0.237630481  |
| IGHV7-40     | pseudo | 0.23428739   |
| C12orf36     | ncRNA  | 0.231520821  |
| LOC101927720 | ncRNA  | 0.231047445  |
| SNORD3B-2    | snoRNA | 0.230642319  |
| PHBP7        | pseudo | 0.228019158  |
| LOC285629    | ncRNA  | 0.221641547  |
| LOC391566    | pseudo | 0.221067028  |
| LOC101928921 | ncRNA  | 0.219663514  |
| LOC389023    | ncRNA  | 0.217694483  |
| LOC101928100 | ncRNA  | 0.2129076    |
| LOC101927678 | ncRNA  | 0.205289295  |
| IGLVI-70     | pseudo | 0.20440033   |
| LINC00470    | ncRNA  | 0.203611562  |
| C21orf128    | ncRNA  | 0.202770239  |
| SNORD3B-1    | snoRNA | 0.201859469  |
| AFAP1-AS1    | ncRNA  | 0.201610691  |
| SERHL        | pseudo | 0.199625336  |
| IGHV1-12     | pseudo | 0.19912662   |
| LOC729966    | pseudo | 0.198169627  |
| KRT19P3      | pseudo | 0.197835262  |
| LINC00160    | ncRNA  | 0.195286915  |
| SNORD3A      | snoRNA | 0.195037758  |
| LOC339807    | ncRNA  | 0.194621872  |
| GAPDHP14     | pseudo | 0.194531364  |
| LOC284100    | pseudo | 0.191510744  |
| LOC647145    | pseudo | 0.190018873  |
| BRWD1-IT2    | ncRNA  | 0.186368839  |
| CYCSP6       | pseudo | 0.184328645  |
| LOC101929128 | ncRNA  | 0.183556043  |
| IGHV7-34-1   | pseudo | 0.183113429  |

|              |        |              |
|--------------|--------|--------------|
| LRRC37A8P    | pseudo | 0.182397066  |
| LOC101928934 | ncRNA  | 0.168459914  |
| MSLNL        | pseudo | 0.163959417  |
| POU6F2-AS2   | ncRNA  | 0.142547767  |
| KRT19P1      | pseudo | 0.139375701  |
| LOC101927971 | ncRNA  | 0.138108084  |
| SCGB1B2P     | pseudo | 0.12965647   |
| HCCAT3       | ncRNA  | 0.123908202  |
| LOC101928295 | ncRNA  | 0.123681379  |
| LOC101927125 | ncRNA  | 0.109970354  |
| ADARB2-AS1   | ncRNA  | 0.100462301  |
| SNORD3D      | snoRNA | 0.100302741  |
| FLJ36000     | ncRNA  | 0.0942851    |
| OR7E39P      | pseudo | 0.08877354   |
| LOC149086    | pseudo | 0.081422711  |
| LOC100420678 | pseudo | 0.073400498  |
| SULT1C2P1    | pseudo | 0.063662486  |
| HIST1H2APS4  | pseudo | 0.060734232  |
| NAMPTL       | pseudo | 0.055144042  |
| LOC729668    | pseudo | 0.054770053  |
| LOC101928099 | ncRNA  | 0.050405293  |
| LOC400553    | ncRNA  | -0.049738819 |
| LINC00628    | ncRNA  | 0.038620719  |
| LOC643201    | pseudo | -0.036652847 |
| LOC100418832 | pseudo | -0.033171371 |
| LOC100996586 | pseudo | -0.024175569 |
| LOC647086    | pseudo | 0.018063445  |
| LOC101928810 | ncRNA  | -0.015108276 |
| LOC100131138 | ncRNA  | -0.013743209 |
| ZNF503-AS1   | ncRNA  | 0.012429697  |
| LINC01018    | ncRNA  | -0.011464252 |
| LINC00319    | ncRNA  | 0.010063845  |
| LINC00578    | ncRNA  | -0.004241341 |
| ALOX12P1     | pseudo | 0.004135181  |
| HSD3BP1      | pseudo | 0.002345154  |
| PGBD4P7      | pseudo | 1.81E-04     |
