# Supplementary material
Source: publisher site journal article supplement (https://www.dovepress.com/article/97664)
Supplement: Supplementary file [file get_supplementary_file.php]

**Table S3 41 pathways dysregulated mRNAs were enriched**

| PathwayID  | PathwayTerm                              | P-Value     | FDR         | Enrichment  |
|------------|------------------------------------------|-------------|-------------|-------------|
| PATH:04060 | Cytokine-cytokine receptor interaction   | 9.52972E-05 | 0.026683215 | 1.634208886 |
| PATH:00140 | Steroid hormone biosynthesis             | 0.000497527 | 0.056188426 | 2.297428938 |
| PATH:04974 | Protein digestion and absorption         | 0.000694721 | 0.056188426 | 1.978444022 |
| PATH:00830 | Retinol metabolism                       | 0.000802692 | 0.056188426 | 2.107539404 |
| PATH:05200 | Pathways in cancer                       | 0.002692583 | 0.150784669 | 1.413266892 |
| PATH:05322 | Systemic lupus erythematosus             | 0.003354369 | 0.153367826 | 1.644640569 |
| PATH:05323 | Rheumatoid arthritis                     | 0.004363851 | 0.153367826 | 1.778072946 |
| PATH:04360 | Axon guidance                            | 0.004381938 | 0.153367826 | 1.634757233 |
| PATH:00350 | Tyrosine metabolism                      | 0.006311375 | 0.1963539   | 2.152862832 |
| PATH:00053 | Ascorbate and aldarate metabolism        | 0.007412338 | 0.207545471 | 2.46760886  |
| PATH:05217 | Basal cell carcinoma                     | 0.010553515 | 0.263989341 | 1.903583978 |
| PATH:05205 | Proteoglycans in cancer                  | 0.013638893 | 0.263989341 | 1.395961584 |
| PATH:00040 | Pentose and glucuronate interconversions | 0.013790754 | 0.263989341 | 2.163163611 |
| PATH:04972 | Pancreatic secretion                     | 0.014727869 | 0.263989341 | 1.60202612  |
| PATH:04610 | Complement and coagulation cascades      | 0.014988928 | 0.263989341 | 1.749617626 |
| PATH:04110 | Cell cycle                               | 0.015085105 | 0.263989341 | 1.535148369 |
| PATH:04340 | Hedgehog signaling pathway               | 0.020689868 | 0.32011982  | 1.784609979 |
| PATH:05034 | Alcoholism                               | 0.023034395 | 0.32011982  | 1.401249317 |
| PATH:05202 | Transcriptional misregulation in cancer  | 0.023034395 | 0.32011982  | 1.401249317 |
| PATH:04022 | cGMP-PKG signaling pathway               | 0.024872294 | 0.32011982  | 1.413266892 |
| PATH:04514 | Cell adhesion molecules (CAMs)           | 0.026647341 | 0.32011982  | 1.441093504 |
| PATH:04913 | Ovarian steroidogenesis                  | 0.02805929  | 0.32011982  | 1.772945861 |
| PATH:03320 | PPAR signaling pathway                   | 0.030548676 | 0.32011982  | 1.631643409 |
| PATH:00982 | Drug metabolism - cytochrome P450        | 0.031446805 | 0.32011982  | 1.607756738 |
| PATH:05204 | Chemical carcinogenesis                  | 0.032962016 | 0.32011982  | 1.566974616 |
| PATH:04151 | PI3K-Akt signaling pathway               | 0.033219345 | 0.32011982  | 1.261741541 |
| PATH:00500 | Starch and sucrose metabolism            | 0.033761704 | 0.32011982  | 1.699628551 |
| PATH:00360 | Phenylalanine metabolism                 | 0.033927247 | 0.32011982  | 2.379479972 |
| PATH:05414 | Dilated cardiomyopathy                   | 0.034150675 | 0.32011982  | 1.533442649 |
| PATH:05218 | Melanoma                                 | 0.034298552 | 0.32011982  | 1.608662516 |
| PATH:00565 | Ether lipid metabolism                   | 0.036020217 | 0.324382739 | 1.812937121 |
| PATH:04080 | Neuroactive ligand-receptor interaction  | 0.038071642 | 0.324382739 | 1.285266554 |

|            |                                                        |             |             |             |
|------------|--------------------------------------------------------|-------------|-------------|-------------|
| PATH:04975 | Fat digestion and absorption                           | 0.038230823 | 0.324382739 | 1.758746066 |
| PATH:04940 | Type I diabetes mellitus                               | 0.041667058 | 0.335695616 | 1.770775793 |
| PATH:05033 | Nicotine addiction                                     | 0.045426851 | 0.335695616 | 1.784609979 |
| PATH:05416 | Viral myocarditis                                      | 0.046775495 | 0.335695616 | 1.563658267 |
| PATH:04510 | Focal adhesion                                         | 0.047561277 | 0.335695616 | 1.310438245 |
| PATH:05412 | Arrhythmogenic right ventricular cardiomyopathy (ARVC) | 0.047610335 | 0.335695616 | 1.543446468 |
| PATH:02010 | ABC transporters                                       | 0.047918119 | 0.335695616 | 1.730530889 |
| PATH:00330 | Arginine and proline metabolism                        | 0.048859865 | 0.335695616 | 1.613206761 |
| PATH:04970 | Salivary secretion                                     | 0.049826432 | 0.335695616 | 1.480565316 |
